# Supplementary material for: Organosoluble and high Tgpolyimides from asymmetric diamines containing N-amino and N-aminophenyl naphthalimide moieties
Source: Royal Society of Chemistry journal article supplement (doi:10.1039/c6ra00143b), 2016-01-01
Supplement: c6ra00143b1.pdf [file c6ra00143b1.pdf]

## Supplementary information

### Organosoluble and high $T_g$ polyimides from asymmetric diamines containing *N*-amino and *N*-aminophenyl naphthalimide moieties

Figure S1:  $^{13}\text{C}$  NMR spectra of diamines **3** and **4**

Figure S2: FTIR spectra of diamines **3** and **4**

Figure S3: UV–Vis absorption spectra for diamines **3** and **4** in NMP ( $1 \times 10^{-5} \text{ mol L}^{-1}$ ) at room temperature

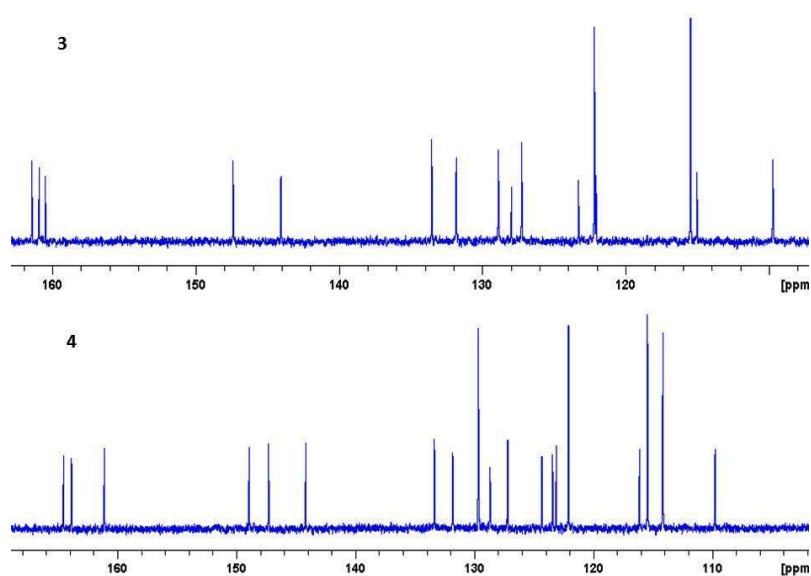

Figure S1:  $^{13}\text{C}$  NMR spectra of diamines **3** and **4**

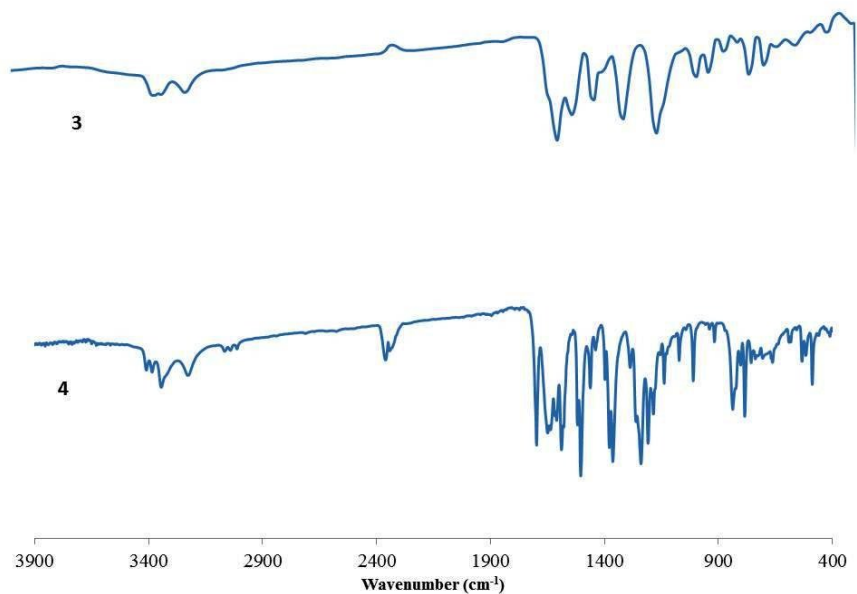

Figure S2: FTIR spectra of diamines **3** and **4**

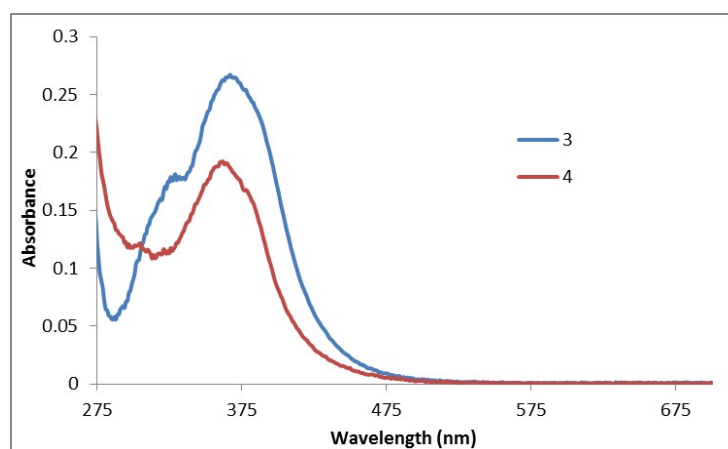

Figure S3: UV-Vis absorption spectra for diamines **3** and **4** in NMP ( $1 \times 10^{-5} \text{ mol L}^{-1}$ )
